# Supplementary material for: Evaluation of PCR conditions for characterizing bacterial communities with full-length 16S rRNA genes using a portable nanopore sequencer
Source: PubMed Central journal article supplement (PMC7387495; doi:10.1038/s41598-020-69450-9), 2020-07-28
Supplement: 41598_2020_69450_MOESM1_ESM.pdf [file 41598_2020_69450_MOESM1_ESM.pdf]

## Supplementary material

1 **Evaluation of PCR conditions for characterizing bacterial**  
2 **communities with full-length 16S rRNA genes using a**  
3 **portable nanopore sequencer**

4 So Fujiyoshi<sup>1,2\*</sup>, Ai Muto-Fujita<sup>3</sup>, Fumito Maruyama<sup>1,2\*</sup>

5 <sup>1</sup> Office of Industry-Academia-Government and Community Collaboration, Hiroshima  
6 University, 1-3-2 Kagamiyama, Higashi-Hiroshima, Hiroshima 739-8511, JAPAN

7 <sup>2</sup> Laboratorio de Ecología Microbiana Aplicada, Departamento de Ciencias Químicas y  
8 Recursos Naturales, Scientific and Biotechnological Bioresource Nucleus (BIOREN-  
9 UFRO), Universidad de La Frontera, Ave. Francisco Salazar 01145, Temuco, CHILE

10 <sup>3</sup> Data Science Center, Nara Institute of Science and Technology, Ikoma, Nara, JAPAN

11

**Supplemental Table S1. Flow cell, MinKNOW and Albacore version information**

| Sample Name<br>(PCR condition)                               | Flow cell version  | MinKNOW version | Albacore version |
|--------------------------------------------------------------|--------------------|-----------------|------------------|
| <i>Vibrio cholerae</i><br>(T0 condition)                     | FLO-MIN 106 R9.4.1 | ver. 1.6.11     | ver. 1.2.1       |
| ZymoBIOMICS mock community<br>(T0 condition)                 | FLO-MIN 106 R9.4.1 | ver. 1.6.11     | ver. 1.2.1       |
| B2<br>(T0 condition)                                         | FLO-MIN 106 R9.4.1 | ver. 1.6.11     | ver. 1.2.1       |
| B6<br>(T0 condition)                                         | FLO-MIN 106 R9.4.1 | ver. 1.7.3      | ver. 1.2.1       |
| B7<br>(T0 condition)                                         | FLO-MIN 106 R9.4.1 | ver. 1.7.3      | ver. 1.2.1       |
| B11<br>(T0 condition)                                        | FLO-MIN 106 R9.4.1 | ver. 1.7.3      | ver. 1.2.1       |
| B13<br>(T0 condition)                                        | FLO-MIN 106 R9.4.1 | ver. 1.7.3      | ver. 1.2.1       |
| B14<br>(T0 condition)                                        | FLO-MIN 106 R9.4.1 | ver. 1.7.3      | ver. 1.2.1       |
| ATCC_mock10<br>(T0 condition)                                | FLO-MIN 106 R9.4.1 | ver. 1.7.14     | ver. 1.2.1       |
| ATCC_mock20<br>(T0 condition)                                | FLO-MIN 106 R9.4.1 | ver. 1.7.14     | ver. 1.2.1       |
| ZymoBIOMICS mock community<br>(T0, T1, T2, T3, T4 condition) | FLO-MIN 106 R9.4.1 | ver. 1.10.23    | ver. 2.1.3       |
| B2, 6<br>(T4 condition)                                      | FLO-MIN 106 R9.4.1 | ver. 1.7.3      | ver. 2.1.3       |
| B7,11,13,14, ATCC10, ATCC20<br>(T4 condition)                | FLO-MIN 106 R9.4.1 | ver. 1.7.3      | ver. 2.1.3       |

**Supplemental Table S2. The proportion of sequences identified at the genus and species level of each PCR condition**

| Mock community<br>(ZymoBIOMICS)  | MinION PCR conditions |         |       |         |       |         |       |         |       |         |
|----------------------------------|-----------------------|---------|-------|---------|-------|---------|-------|---------|-------|---------|
|                                  | T0                    |         | T1    |         | T2    |         | T3    |         | T4    |         |
|                                  | Genus                 | Species | Genus | Species | Genus | Species | Genus | Species | Genus | Species |
| <i>Pseudomonas aeruginosa</i>    | 1.6%                  | 1.3%    | 5.9%  | 3.5%    | 4.1%  | 2.1%    | 4.1%  | 1.9%    | 4.4%  | 2.3%    |
| <i>Escherichia/Shigella coli</i> | 4.4%                  | 0.9%    | 11.7% | 2.1%    | 5.8%  | 1.0%    | 4.6%  | 1.0%    | 4.4%  | 0.9%    |
| <i>Enterococcus faecalis</i>     | 8.2%                  | 3.1%    | 4.9%  | 2.5%    | 8.8%  | 4.1%    | 9.1%  | 3.7%    | 8.5%  | 3.6%    |
| <i>Salmonella enterica</i>       | 10.7%                 | 10.0%   | 25.2% | 24.0%   | 12.1% | 11.4%   | 10.6% | 9.8%    | 9.6%  | 9.0%    |
| <i>Staphylococcus aureus</i>     | 15.7%                 | 3.5%    | 7.0%  | 1.8%    | 14.9% | 3.6%    | 15.3% | 3.7%    | 16.5% | 4.0%    |
| <i>Bacillus subtilis</i>         | 22.8%                 | 5.8%    | 11.6% | 3.3%    | 19.5% | 5.2%    | 21.2% | 5.2%    | 19.9% | 5.1%    |
| <i>Listeria monocytogenes</i>    | 10.5%                 | 1.7%    | 6.1%  | 0.7%    | 10.8% | 1.4%    | 10.8% | 1.7%    | 11.0% | 1.6%    |
| <i>Lactobacillus fermentum</i>   | 5.9%                  | 3.2%    | 4.4%  | 2.9%    | 6.8%  | 4.4%    | 7.1%  | 4.3%    | 8.9%  | 5.5%    |
| Others                           | 18.9%                 | 70.5%   | 23.2% | 59.3%   | 17.4% | 66.8%   | 18.3% | 68.7%   | 16.9% | 68.1%   |
| Dissimilarity values             | 0.284                 | 0.705   | 0.400 | 0.722   | 0.238 | 0.672   | 0.247 | 0.687   | 0.243 | 0.680   |

**Supplemental Table S3. The proportion of sequences identified at the genus and species level of each sample and condition**

| Mock community<br>(ATCC10)          | MiSeq |         | MinION_PCR(T0) |         | MinION_PCR(T4) |         |
|-------------------------------------|-------|---------|----------------|---------|----------------|---------|
|                                     | Genus | Species | Genus          | Species | Genus          | Species |
| <i>Bacillus cereus</i>              | 12.2% | 0.5%    | 3.3%           | 2.7%    | 3.7%           | 2.9%    |
| <i>Bifidobacterium adolescentis</i> | 7.6%  | 5.2%    | ND             | ND      | ND             | ND      |
| <i>Clostridium beijerinckii</i>     | 20.7% | 5.7%    | 16.1%          | 12.5%   | 16.2%          | 12.9%   |
| <i>Deinococcus radiodurans</i>      | 8.5%  | 8.1%    | 13.4%          | 13.3%   | 13.8%          | 13.7%   |
| <i>Enterococcus faecalis</i>        | 4.3%  | 3.3%    | 6.6%           | 6.1%    | 5.2%           | 4.9%    |
| <i>Escherichia coli</i>             | 9.8%  | 0.1%    | 14.1%          | 0.4%    | 11.7%          | 0.5%    |
| <i>Lactobacillus gasseri</i>        | 8.1%  | 6.7%    | 8.3%           | 7.7%    | 6.6%           | 6.1%    |
| <i>Rhodobacter sphaeroides</i>      | 3.3%  | 1.5%    | 7.0%           | 3.8%    | 9.7%           | 7.1%    |
| <i>Staphylococcus epidermidis</i>   | 10.5% | 5.9%    | 9.5%           | 2.8%    | 11.2%          | 2.2%    |
| <i>Streptococcus mutans</i>         | 10.8% | 9.7%    | 11.2%          | 10.9%   | 9.1%           | 9.0%    |
| Others                              | 4.1%  | 53.3%   | 10.5%          | 39.8%   | 12.8%          | 40.8%   |
| Dissimilarity values                | 0.184 | 0.533   | 0.253          | 0.465   | 0.257          | 0.473   |

ND: Not Detected

| Mock community<br>(ATCC20)          | MiSeq |         | MinION_PCR(T0) |         | MinION_PCR(T4) |         |
|-------------------------------------|-------|---------|----------------|---------|----------------|---------|
|                                     | Genus | Species | Genus          | Species | Genus          | Species |
| <i>Acinetobacter baumannii</i>      | 8.2%  | 7.0%    | 4.4%           | 1.7%    | 6.9%           | 6.5%    |
| <i>Actinomyces odontolyticus</i>    | 1.7%  | 1.6%    | 0.1%           | ND      | 0.1%           | 0.1%    |
| <i>Bacillus cereus</i>              | 5.2%  | 0.3%    | 2.0%           | 0.4%    | 2.6%           | 1.8%    |
| <i>Bacteroides vulgatus</i>         | 9.3%  | 9.2%    | 1.2%           | 1.0%    | 4.8%           | 4.8%    |
| <i>Bifidobacterium adolescentis</i> | 4.1%  | 2.6%    | ND             | ND      | ND             | ND      |
| <i>Clostridium beijerinckii</i>     | 12.2% | 3.5%    | 8.9%           | 3.0%    | 8.4%           | 6.8%    |
| <i>Deinococcus radiodurans</i>      | 3.5%  | 3.2%    | 6.8%           | 5.3%    | 7.4%           | 7.3%    |
| <i>Enterococcus faecalis</i>        | 2.4%  | 1.8%    | 4.4%           | 1.8%    | 2.7%           | 2.6%    |
| <i>Escherichia coli</i>             | 4.4%  | 0.2%    | 6.9%           | 1.4%    | 9.4%           | 0.4%    |
| <i>Helicobacter pylori</i>          | 3.8%  | 3.3%    | 5.9%           | 4.4%    | 6.0%           | 5.9%    |

|                                   |       |       |       |       |       |       |
|-----------------------------------|-------|-------|-------|-------|-------|-------|
| <i>Lactobacillus gasseri</i>      | 4.2%  | 3.3%  | 6.3%  | 2.4%  | 3.7%  | 3.3%  |
| <i>Neisseria meningitidis</i>     | 5.8%  | 4.6%  | 2.6%  | 1.4%  | 5.5%  | 0.3%  |
| <i>Porphyromonas gingivalis</i>   | 7.8%  | 7.7%  | 0.8%  | 0.7%  | 2.8%  | 2.7%  |
| <i>Propionibacterium acnes</i>    | 0.9%  | 0.9%  | 0.5%  | 0.4%  | 0.7%  | 0.7%  |
| <i>Pseudomonas aeruginosa</i>     | 2.9%  | 2.3%  | 2.1%  | 1.1%  | 4.3%  | 4.0%  |
| <i>Rhodobacter sphaeroides</i>    | 0.9%  | 0.4%  | 3.0%  | 1.2%  | 5.0%  | 3.0%  |
| <i>Staphylococcus aureus</i>      |       | 1.6%  |       | 1.1%  |       | 0.6%  |
| <i>Staphylococcus epidermidis</i> | 9.6%  | 3.0%  | 10.2% | 1.8%  | 11.9% | 1.3%  |
| <i>Streptococcus agalactiae</i>   |       | 4.7%  |       | 4.5%  |       | 5.6%  |
| <i>Streptococcus mutans</i>       | 10.7% | 5.0%  | 15.3% | 4.1%  | 11.1% | 5.2%  |
| Others                            | 2.3%  | 33.8% | 18.7% | 62.2% | 6.7%  | 37.1% |
| Dissimilarity values              | 0.216 | 0.427 | 0.338 | 0.625 | 0.233 | 0.444 |

ND: Not Detected

| Environmental sample (B2) | MiSeq | MinION_PCR(T0) | MinION_PCR(T4) |
|---------------------------|-------|----------------|----------------|
| <i>Methylobacterium</i>   | 26.2% | 40.1%          | 39.2%          |
| <i>Moraxella</i>          | 8.0%  | 9.6%           | 11.9%          |
| <i>Sphingomonas</i>       | 32.0% | 43.0%          | 42.8%          |
| <i>Enhydrobacter</i>      | 6.1%  | 1.7%           | 1.7%           |
| <i>Chryseobacterium</i>   | 2.2%  | 0.2%           | 0.3%           |
| <i>Brevundimonas</i>      | 1.4%  | 0.6%           | 1.2%           |
| <i>Sphingobium</i>        | 1.4%  | 1.8%           | 1.4%           |
| <i>Asticcacaulis</i>      | 0.3%  | 0.0%           | 0.0%           |
| <i>Rhizobium</i>          | 0.1%  | 0.1%           | 0.1%           |
| <i>Acidovorax</i>         | 0.3%  | 0.4%           | 0.1%           |
| <i>Burkholderia</i>       | 0.0%  | 0.0%           | 0.0%           |
| <i>Acinetobacter</i>      | 0.1%  | 0.1%           | 0.1%           |
| <i>Novosphingobium</i>    | 0.1%  | 0.1%           | 0.1%           |
| <i>Streptococcus</i>      | 0.0%  | 0.0%           | 0.0%           |
| Unassigned                | 21.3% | 2.0%           | 0.0%           |
| Others                    | 0.5%  | 0.3%           | 1.1%           |

| Environmental sample (B6) | MiSeq | MinION_PCR(T0) | MinION_PCR(T4) |
|---------------------------|-------|----------------|----------------|
| <i>Methylobacterium</i>   | 71.7% | 62.3%          | 71.6%          |

|                         |       |       |       |
|-------------------------|-------|-------|-------|
| <i>Blastomonas</i>      | 12.8% | 13.5% | 13.2% |
| <i>Sphingomonas</i>     | 9.8%  | 6.9%  | 8.5%  |
| <i>Acinetobacter</i>    | 3.5%  | 2.7%  | 2.4%  |
| <i>Bdellovibrio</i>     | 0.2%  | 0.0%  | 0.0%  |
| <i>Sphingopyxis</i>     | 0.2%  | 0.2%  | 0.4%  |
| <i>Desulfovibrio</i>    | 0.2%  | 0.0%  | 0.0%  |
| <i>Runella</i>          | 0.1%  | 0.0%  | 0.0%  |
| <i>Polymorphobacter</i> | 0.1%  | 0.1%  | 0.0%  |
| <i>Chryseolinea</i>     | 0.1%  | 0.0%  | 0.0%  |
| <i>Caulobacter</i>      | 0.1%  | 0.1%  | 0.2%  |
| <i>Pseudomonas</i>      | 0.1%  | 0.0%  | 0.1%  |
| <i>Desulfarculus</i>    | 0.1%  | 0.0%  | 0.0%  |
| <i>Emticicia</i>        | 0.1%  | 0.0%  | 0.0%  |
| Unassigned              | 0.1%  | 12.1% | 0.0%  |
| Others                  | 0.9%  | 2.2%  | 3.5%  |

| Environmental sample (B7) | MiSeq | MinION_PCR(T0) | MinION_PCR(T4) |
|---------------------------|-------|----------------|----------------|
| <i>Roseomonas</i>         | 19.3% | 31.0%          | 37.7%          |
| <i>Actinomycetospora</i>  | 17.5% | 3.2%           | 1.9%           |
| <i>Geminicoccus</i>       | 4.5%  | 2.1%           | 2.8%           |
| <i>Sphaerobacter</i>      | 3.4%  | 0.0%           | 0.1%           |
| <i>Luteimonas</i>         | 2.2%  | 6.2%           | 5.0%           |
| <i>Pelotomaculum</i>      | 2.1%  | 0.0%           | 0.0%           |
| <i>Sphingomonas</i>       | 3.1%  | 2.7%           | 3.9%           |
| <i>Oscillochloris</i>     | 1.6%  | 0.1%           | 0.1%           |
| <i>Fibrisoma</i>          | 1.2%  | 0.4%           | 0.4%           |
| <i>Brevundimonas</i>      | 1.9%  | 1.2%           | 2.6%           |
| <i>Kocuria</i>            | 1.2%  | 0.7%           | 0.5%           |
| <i>Methylobacterium</i>   | 4.6%  | 5.5%           | 6.2%           |
| <i>Salinactinospora</i>   | 0.7%  | 0.0%           | 0.0%           |
| <i>Dehalogenimonas</i>    | 0.8%  | 0.0%           | 0.0%           |
| Unassigned                | 0.1%  | 15.2%          | 0.0%           |
| Others                    | 35.7% | 31.9%          | 38.8%          |

| Environmental sample (B11) | MiSeq | MinION_PCR(T0) | MinION_PCR(T4) |
|----------------------------|-------|----------------|----------------|
| <i>Deinococcus</i>         | 34.4% | 6.8%           | 10.4%          |
| <i>Moraxella</i>           | 12.8% | 50.6%          | 44.3%          |

|                           |       |       |       |
|---------------------------|-------|-------|-------|
| <i>Enhydrobacter</i>      | 7.1%  | 8.6%  | 1.9%  |
| <i>Barrientosiiimonas</i> | 3.9%  | 3.7%  | 3.7%  |
| <i>Chryseobacterium</i>   | 2.5%  | 0.3%  | 3.7%  |
| <i>Sphaerobacter</i>      | 1.5%  | 0.0%  | 0.2%  |
| <i>Nakamurella</i>        | 2.5%  | 2.5%  | 2.8%  |
| <i>Brevibacterium</i>     | 1.6%  | 1.2%  | 1.9%  |
| <i>Sphingomonas</i>       | 3.6%  | 6.4%  | 8.9%  |
| <i>Niabella</i>           | 1.2%  | 1.8%  | 2.7%  |
| <i>Actinomycetospora</i>  | 0.8%  | 0.3%  | 0.3%  |
| <i>Brevundimonas</i>      | 0.9%  | 0.7%  | 1.9%  |
| <i>Streptococcus</i>      | 1.1%  | 0.2%  | 0.3%  |
| <i>Methylobacterium</i>   | 0.9%  | 1.1%  | 2.1%  |
| Unassigned                | 18.2% | 1.5%  | 0.0%  |
| Others                    | 7.1%  | 14.3% | 14.8% |

| Environmental sample (B13) | MiSeq | MinION_PCR(T0) | MinION_PCR(T4) |
|----------------------------|-------|----------------|----------------|
| <i>Blastocatella</i>       | 9.4%  | 3.3%           | 2.2%           |
| <i>Actinomycetospora</i>   | 14.0% | 12.3%          | 8.9%           |
| <i>Methylobacterium</i>    | 12.4% | 23.7%          | 25.8%          |
| <i>Longilinea</i>          | 4.2%  | 0.2%           | 0.1%           |
| <i>Belnapia</i>            | 2.3%  | 1.0%           | 2.1%           |
| <i>Oscillochloris</i>      | 1.4%  | 0.1%           | 0.2%           |
| <i>Exiguobacterium</i>     | 1.4%  | 0.0%           | 0.0%           |
| <i>Sphingorhabdus</i>      | 1.2%  | 0.0%           | 0.0%           |
| <i>Pyrinomonas</i>         | 1.1%  | 0.0%           | 0.2%           |
| <i>Caloribacterium</i>     | 1.1%  | 0.0%           | 0.0%           |
| <i>Sphingomonas</i>        | 4.2%  | 4.7%           | 6.6%           |
| <i>Pseudonocardia</i>      | 2.5%  | 1.9%           | 1.4%           |
| <i>Kribbella</i>           | 2.5%  | 1.6%           | 1.3%           |
| <i>Roseomonas</i>          | 1.3%  | 2.4%           | 3.7%           |
| Unassigned                 | 4.4%  | 1.5%           | 0.0%           |
| Others                     | 36.7% | 47.1%          | 47.6%          |

| Environmental sample (B14) | MiSeq | MinION_PCR(T0) | MinION_PCR(T4) |
|----------------------------|-------|----------------|----------------|
| <i>Deinococcus</i>         | 33.7% | 9.6%           | 7.6%           |
| <i>Moraxella</i>           | 11.4% | 50.9%          | 50.3%          |
| <i>Enhydrobacter</i>       | 6.8%  | 7.8%           | 2.7%           |
| <i>Chryseobacterium</i>    | 2.9%  | 0.4%           | 2.0%           |

|                          |       |       |       |
|--------------------------|-------|-------|-------|
| <i>Barrientosiimonas</i> | 2.8%  | 3.8%  | 2.7%  |
| <i>Sphaerobacter</i>     | 1.8%  | 0.0%  | 0.1%  |
| <i>Brevibacterium</i>    | 1.6%  | 1.5%  | 1.0%  |
| <i>Niabella</i>          | 1.3%  | 1.5%  | 2.3%  |
| <i>Nakamurella</i>       | 2.1%  | 2.7%  | 2.1%  |
| <i>Sphingomonas</i>      | 3.1%  | 7.0%  | 11.6% |
| <i>Actinomyces</i>       | 0.9%  | 0.3%  | 0.2%  |
| <i>Bosea</i>             | 0.5%  | 1.5%  | 2.2%  |
| <i>Sphingobium</i>       | 0.5%  | 0.6%  | 1.1%  |
| <i>Brevundimonas</i>     | 0.4%  | 0.6%  | 2.2%  |
| Unassigned               | 25.5% | 0.5%  | 0.0%  |
| Others                   | 4.8%  | 11.3% | 11.9% |



**Supplemental Table S4. PCR details for full-length 16S rRNA analyses using MinION**

|               |                                                                  |                                                                                                                                                                                                       |                                                               |                                                               |                                                        |                                                          |
|---------------|------------------------------------------------------------------|-------------------------------------------------------------------------------------------------------------------------------------------------------------------------------------------------------|---------------------------------------------------------------|---------------------------------------------------------------|--------------------------------------------------------|----------------------------------------------------------|
| Ref           | This study (PCR condition T4)                                    | Nanopore 16S Barcoding Kit protocol (ver. RAB_9053_v1_revL_14Aug2019)                                                                                                                                 | Shin et al. SciRep 6:29681 (2016)                             | Benítez-Páez et al. GigaScience 5, 4 (2016)                   | Mitsuhashi et al. Sci Rep. 7:5657 (2017)               | Kai et al. FEBS Open Bio. 9:548-557 (2019)               |
| Ref No.       | –                                                                | <a href="https://community.nanoporetech.com/protocols/16S-barcoding-sequencing/checklist_example.pdf">https://community.nanoporetech.com/protocols/16S-barcoding-sequencing/checklist_example.pdf</a> | [56]                                                          | [22]                                                          | [23]                                                   | [38]                                                     |
| Enzyme        | MightyAmp DNA Polymerase Ver. 2 (Takara Bio, Inc., Tokyo, Japan) | LongAmp Taq 2× Master Mix (New England Biolabs, MA, USA)                                                                                                                                              | Phusion High-Fidelity polymerase (Thermo Scientific, MA, USA) | Phusion High-Fidelity polymerase (Thermo Scientific, MA, USA) | KAPA HiFi HotStart ReadyMix (KAPA Biosystems, MA, USA) | LongAmp Taq 2× Master Mix (New England Biolabs, MA, USA) |
| Denaturation  | 95°C for 1 min                                                   | 95°C for 20 sec                                                                                                                                                                                       | 98°C for 10 sec                                               | 95°C for 20 sec                                               | 98°C for 20 sec                                        | 95°C for 20 sec                                          |
| Annealing     | 60°C for 1 min                                                   | 55°C for 30 sec                                                                                                                                                                                       | 47°C for 30 sec                                               | 47°C for 30 sec                                               | 60°C for 15 sec                                        | 55°C for 30 sec                                          |
| Extension     | 68°C for 3 min                                                   | 65°C for 2 min                                                                                                                                                                                        | 72°C for 1 min                                                | 72°C for 1 mi                                                 | 72°C for 15 sec                                        | 65°C for 2 min                                           |
| No. of cycles | 35                                                               | 25                                                                                                                                                                                                    | 15                                                            | 30                                                            | 25                                                     | 25                                                       |

## **Reference**

56. Shin, J. et al. Analysis of the mouse gut microbiome using full-length 16S rRNA amplicon sequencing. *Sci. Rep.* 6, 29681 (2016).
